# Supplementary material for: Facile construction of magnetic α-Fe2O3/SiO2 composite aerogels for enhanced adsorption and visible light photocatalytic activity
Source: Royal Society of Chemistry journal article supplement (doi:10.1039/d5ce00237k), 2025-01-01
Supplement: d5ce00237k1.pdf [file d5ce00237k1.pdf]

**Electronic Supplementary Information**

**Facile construction of magnetic  $\alpha$ -Fe<sub>2</sub>O<sub>3</sub>/SiO<sub>2</sub> composite aerogels  
for enhanced adsorption and visible light photocatalytic activity**

Kaiwen Wu<sup>a</sup>, Jichao Shi<sup>a\*1</sup>, Daqing Wang<sup>a</sup>, Honghao Ni<sup>a</sup>, Runping Jia<sup>a</sup>, Yufeng Liu<sup>a</sup>,  
Lin Lin<sup>b</sup>, Dandan Wu<sup>a</sup>, Shufang Chang<sup>a</sup>, Yaqi Wang<sup>a</sup> and Qin Xin<sup>a</sup>

<sup>a</sup> School of Materials Science and Engineering, Shanghai Institute of Technology,  
Shanghai 200235, P.R. China.

<sup>b</sup> School of Chemistry and Chemical Engineering, Shanghai Institute of Technology,  
Shanghai 200235, P.R. China.

\*Corresponding authors

Jichao Shi, Email: jcschi@sit.edu.cn

---

<sup>1</sup> Fax: +86 21 60873117, Tel: +86 21 60873117

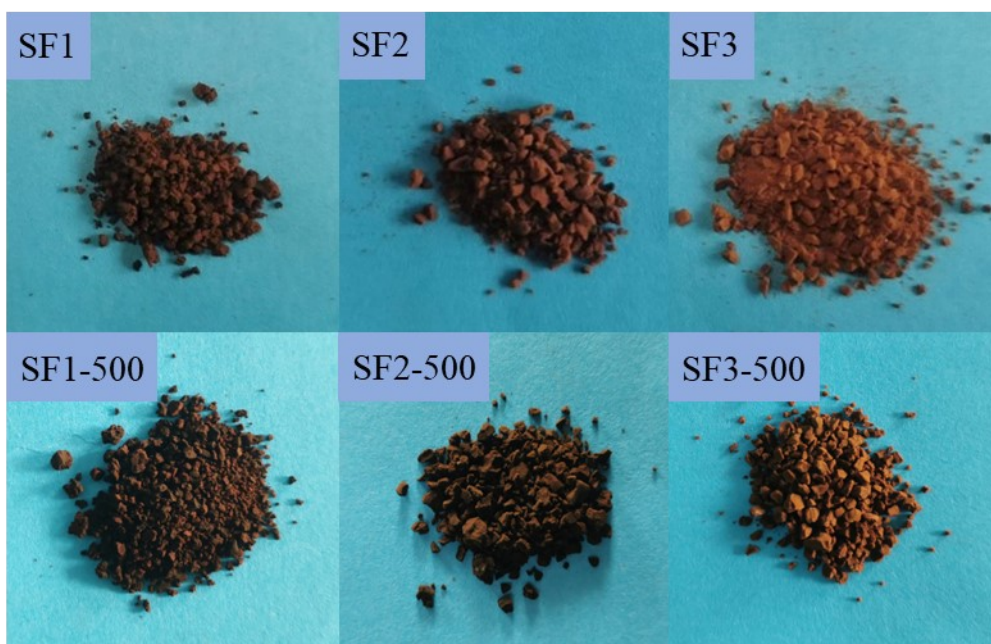

Fig. S1. The photos of the synthesized  $\text{Fe}_2\text{O}_3/\text{SiO}_2$  composite aerogel samples (SF1, SF2 and SF3) and their counterparts calcined at 500 °C (SF1-500, SF2-500 and SF3-500).  $\text{Fe}_2\text{O}_3/\text{SiO}_2$  composite aerogel attracted by magnet (a) and (b).

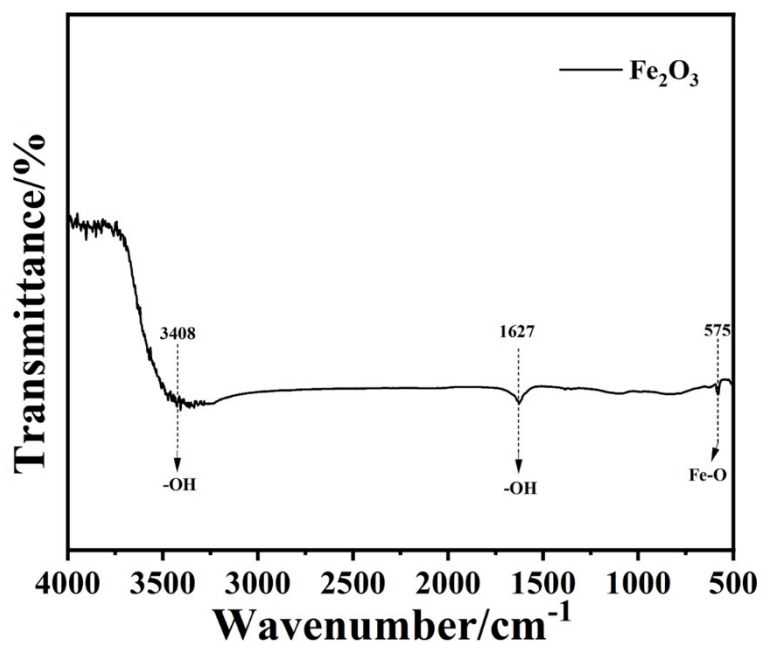

Fig. S2. FTIR spectra of the sample  $\text{Fe}_2\text{O}_3$ .

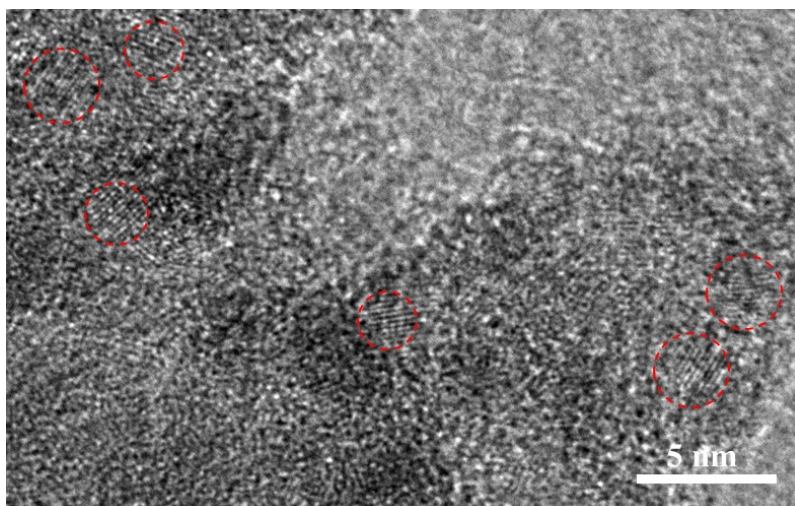

Fig. S3. TEM image of the SF1-500.
